# Supplementary material
Source: PubMed Central journal article supplement (PMC4157114)
Supplement: NIHMS565468-supplement-Supp_Table_S1.pdf [file NIHMS565468-supplement-Supp_Table_S1.pdf]

**Table S1. Maternal Characteristics by the Status of Adverse Pregnancy Outcomes (APOs)**

| Maternal Characteristic                                                 |                    | No APOs<br>(N=1014)<br>n (%) | APOs<br>(N=498)<br>n (%) | Total<br>(N=1512)<br>n | P-value* |
|-------------------------------------------------------------------------|--------------------|------------------------------|--------------------------|------------------------|----------|
| <b>Maternal age (years)</b>                                             |                    |                              |                          |                        |          |
|                                                                         | <25                | 314 (71.7)                   | 124 (28.3)               | 438                    | 0.0235   |
|                                                                         | 25-29              | 315 (67.2)                   | 154 (32.8)               | 469                    |          |
|                                                                         | >29                | 385 (63.6)                   | 220 (36.4)               | 605                    |          |
| <b>BMI at or near delivery adjusted by GA (kg/m<sup>2</sup>)</b>        |                    |                              |                          |                        |          |
|                                                                         | Low (<18.5)        | 46 (47.4)                    | 51 (52.6)                | 97                     | <.0001   |
|                                                                         | Normal (18.5-24.9) | 510 (66.8)                   | 253 (33.2)               | 763                    |          |
|                                                                         | High (≥ 25)        | 323 (74.8)                   | 109 (25.2)               | 432                    |          |
|                                                                         | Missing            | 135                          | 85                       | 220                    |          |
| <b>History of stillbirth</b>                                            |                    |                              |                          |                        |          |
|                                                                         | No                 | 984 (67.3)                   | 478 (32.7)               | 1462                   | 0.2866   |
|                                                                         | Yes                | 30 (60.0)                    | 20 (40.0)                | 50                     |          |
| <b>Number of previous stillbirths</b>                                   |                    |                              |                          |                        |          |
|                                                                         | 0                  | 984 (67.3)                   | 478 (32.7)               | 1462                   | 0.5345   |
|                                                                         | 1                  | 28 (59.6)                    | 19 (40.4)                | 47                     |          |
|                                                                         | >1                 | 2 (66.7)                     | 1 (33.3)                 | 3                      |          |
| <b>History of preterm birth</b>                                         |                    |                              |                          |                        |          |
|                                                                         | No                 | 925 (68.3)                   | 429 (31.7)               | 1354                   | 0.0031   |
|                                                                         | Yes                | 89 (56.3)                    | 69 (43.7)                | 158                    |          |
| <b>Number of previous preterm births</b>                                |                    |                              |                          |                        |          |
|                                                                         | 0                  | 925 (68.3)                   | 429 (31.7)               | 1354                   | 0.0029   |
|                                                                         | 1                  | 75 (59.2)                    | 51 (40.5)                | 126                    |          |
|                                                                         | >1                 | 14 (43.8)                    | 18 (56.3)                | 32                     |          |
| <b>CD4 count at entry (cells/mm<sup>3</sup>)</b>                        |                    |                              |                          |                        |          |
|                                                                         | <200               | 122 (59.8)                   | 82 (40.2)                | 204                    | 0.0521   |
|                                                                         | 200-499            | 511 (67.4)                   | 247 (32.6)               | 758                    |          |
|                                                                         | ≥ 500              | 364 (69.2)                   | 162 (30.8)               | 526                    |          |
|                                                                         | Missing            | 17                           | 7                        | 24                     |          |
| <b>CD4 count at hospital discharge (cells/mm<sup>3</sup>)</b>           |                    |                              |                          |                        |          |
|                                                                         | <200               | 88 (61.5)                    | 55 (38.5)                | 143                    | 0.1275   |
|                                                                         | 200-499            | 408 (67.3)                   | 198 (32.7)               | 606                    |          |
|                                                                         | ≥ 500              | 443 (70.1)                   | 189 (29.9)               | 632                    |          |
|                                                                         | Missing            | 75                           | 56                       | 131                    |          |
| <b>Plasma HIV-1 RNA concentration at entry (copies/ml)</b>              |                    |                              |                          |                        |          |
|                                                                         | <400               | 568 (68.4)                   | 263 (31.6)               | 831                    | 0.2227   |
|                                                                         | ≥ 400              | 430 (65.3)                   | 228 (34.7)               | 658                    |          |
|                                                                         | Missing            | 16                           | 7                        | 23                     |          |
| <b>Plasma HIV-1 RNA concentration at hospital discharge (copies/ml)</b> |                    |                              |                          |                        |          |
|                                                                         | <400               | 758 (69.2)                   | 338 (30.8)               | 1096                   | 0.0220   |
|                                                                         | ≥ 400              | 188 (62.0)                   | 115 (38.0)               | 303                    |          |
|                                                                         | Missing            | 68                           | 45                       | 113                    |          |

| <b>Table S1. Maternal Characteristics by the Status of Adverse Pregnancy Outcomes (APOs)</b>           |                                       |                                   |                                 |                 |  |
|--------------------------------------------------------------------------------------------------------|---------------------------------------|-----------------------------------|---------------------------------|-----------------|--|
| <b>Maternal Characteristic</b>                                                                         | <b>No APOs<br/>(N=1014)<br/>n (%)</b> | <b>APOs<br/>(N=498)<br/>n (%)</b> | <b>Total<br/>(N=1512)<br/>n</b> | <b>P-value*</b> |  |
| <b>CDC HIV clinical classification as of hospital discharge</b>                                        |                                       |                                   |                                 |                 |  |
| A                                                                                                      | 885 (68.2)                            | 413 (31.8)                        | 1298                            | 0.0344          |  |
| B                                                                                                      | 61 (64.9)                             | 33 (35.1)                         | 94                              |                 |  |
| C                                                                                                      | 68 (56.7)                             | 52 (43.3)                         | 120                             |                 |  |
| <b>Alcohol use during pregnancy</b>                                                                    |                                       |                                   |                                 |                 |  |
| No                                                                                                     | 884 (67.7)                            | 421 (32.3)                        | 1305                            | 0.2074          |  |
| Yes                                                                                                    | 115 (62.8)                            | 68 (37.2)                         | 183                             |                 |  |
| Missing                                                                                                | 15                                    | 9                                 | 24                              |                 |  |
| <b>Tobacco use during pregnancy</b>                                                                    |                                       |                                   |                                 |                 |  |
| No                                                                                                     | 785 (70.0)                            | 337 (30.0)                        | 1122                            | <.0001          |  |
| Yes                                                                                                    | 217 (58.3)                            | 155 (41.7)                        | 372                             |                 |  |
| Missing                                                                                                | 12                                    | 6                                 | 18                              |                 |  |
| <b>Marijuana use during pregnancy</b>                                                                  |                                       |                                   |                                 |                 |  |
| No                                                                                                     | 959 (67.2)                            | 468 (32.8)                        | 1427                            | 0.8641          |  |
| Yes                                                                                                    | 27 (69.2)                             | 12 (30.8)                         | 39                              |                 |  |
| Missing                                                                                                | 28                                    | 18                                | 46                              |                 |  |
| <b>Crack/Cocaine use during pregnancy</b>                                                              |                                       |                                   |                                 |                 |  |
| No                                                                                                     | 957 (67.5)                            | 461 (32.5)                        | 1418                            | 0.2555          |  |
| Yes                                                                                                    | 26 (59.1)                             | 18 (40.9)                         | 44                              |                 |  |
| Missing                                                                                                | 31                                    | 19                                | 50                              |                 |  |
| <b>Prophylaxis for opportunistic pneumocystis carinii pneumonia (PCP) during pregnancy</b>             |                                       |                                   |                                 |                 |  |
| No                                                                                                     | 940 (67.5)                            | 452 (32.5)                        | 1392                            | 0.1898          |  |
| Yes                                                                                                    | 74 (61.7)                             | 46 (38.3)                         | 120                             |                 |  |
| <b>Receipt of ARVs at conception</b>                                                                   |                                       |                                   |                                 |                 |  |
| No                                                                                                     | 823 (68.5)                            | 379 (31.5)                        | 1202                            | 0.0207          |  |
| Yes                                                                                                    | 188 (61.4)                            | 118 (38.6)                        | 306                             |                 |  |
| Missing                                                                                                | 3                                     | 1                                 | 4                               |                 |  |
| <b>Duration of ARV exposure during pregnancy (Weeks)</b>                                               |                                       |                                   |                                 |                 |  |
| <12                                                                                                    | 226 (59.8)                            | 152 (40.2)                        | 378                             | 0.0012          |  |
| 12 - 24                                                                                                | 466 (70.9)                            | 191 (29.1)                        | 657                             |                 |  |
| >24                                                                                                    | 322 (67.5)                            | 155 (32.5)                        | 477                             |                 |  |
| <b>Most complex ARV regimen received at least 28 days during pregnancy</b>                             |                                       |                                   |                                 |                 |  |
| HAART PI                                                                                               | 597 (65.8)                            | 310 (34.2)                        | 907                             | 0.3362          |  |
| HAART not PI                                                                                           | 283 (69.2)                            | 126 (30.8)                        | 409                             |                 |  |
| Non HAART                                                                                              | 93 (71.5)                             | 37 (28.5)                         | 130                             |                 |  |
| No ARV or <28 days                                                                                     | 41 (62.1)                             | 25 (37.9)                         | 66                              |                 |  |
| <b>Most complex ARV regimen received at least 28 days during 1<sup>st</sup> trimester of pregnancy</b> |                                       |                                   |                                 |                 |  |
| HAART PI                                                                                               | 118 (61.5)                            | 74 (38.5)                         | 192                             | 0.1026          |  |
| HAART not PI                                                                                           | 94 (61.8)                             | 58 (38.2)                         | 152                             |                 |  |
| Non HAART                                                                                              | 15 (65.2)                             | 8 (34.8)                          | 23                              |                 |  |
| No ARV or <28 days                                                                                     | 787 (68.7)                            | 358 (31.3)                        | 1145                            |                 |  |
| <b>Most complex ARV regimen received at least 28 days during 3<sup>rd</sup> trimester of pregnancy</b> |                                       |                                   |                                 |                 |  |
| HAART PI                                                                                               | 589 (66.3)                            | 299 (33.7)                        | 888                             | 0.0138          |  |
| HAART not PI                                                                                           | 286 (69.8)                            | 124 (30.2)                        | 410                             |                 |  |

**Table S1.** Maternal Characteristics by the Status of Adverse Pregnancy Outcomes (APOs)

| <b>Maternal Characteristic</b>                                                                                                                                                  |                    | <b>No APOs<br/>(N=1014)<br/>n (%)</b> | <b>APOs<br/>(N=498)<br/>n (%)</b> | <b>Total<br/>(N=1512)<br/>n</b> | <b>P-value*</b> |
|---------------------------------------------------------------------------------------------------------------------------------------------------------------------------------|--------------------|---------------------------------------|-----------------------------------|---------------------------------|-----------------|
|                                                                                                                                                                                 | Non HAART          | 97 (72.4)                             | 37 (27.6)                         | 134                             |                 |
|                                                                                                                                                                                 | No ARV or <28 days | 42 (52.5)                             | 38 (47.5)                         | 80                              |                 |
| <b>Reason for receiving ARVs</b>                                                                                                                                                |                    |                                       |                                   |                                 |                 |
|                                                                                                                                                                                 | Prophylaxis        | 518 (70.7)                            | 215 (29.3)                        | 733                             | 0.0284          |
|                                                                                                                                                                                 | Treatment          | 470 (65.3)                            | 250 (34.7)                        | 720                             |                 |
|                                                                                                                                                                                 | Missing            | 26                                    | 33                                | 59                              |                 |
| <b>Maternal anemia during pregnancy (Hb &lt;=8.4g/dl)</b>                                                                                                                       |                    |                                       |                                   |                                 |                 |
|                                                                                                                                                                                 | No                 | 675 (67.0)                            | 333 (33.0)                        | 1008                            | 0.1601          |
|                                                                                                                                                                                 | Yes                | 94 (73.4)                             | 34 (26.6)                         | 128                             |                 |
|                                                                                                                                                                                 | Missing            | 245                                   | 131                               | 376                             |                 |
| <b>Hospitalization during pregnancy</b>                                                                                                                                         |                    |                                       |                                   |                                 |                 |
|                                                                                                                                                                                 | No                 | 974 (69.2)                            | 433 (30.8)                        | 1407                            | <.0001          |
|                                                                                                                                                                                 | Yes                | 40 (38.1)                             | 65 (61.9)                         | 105                             |                 |
| <b>Urinary tract infection during pregnancy</b>                                                                                                                                 |                    |                                       |                                   |                                 |                 |
|                                                                                                                                                                                 | No                 | 917 (67.0)                            | 451 (33.0)                        | 1368                            | 1.0000          |
|                                                                                                                                                                                 | Yes                | 97 (67.4)                             | 47 (32.6)                         | 144                             |                 |
| <b>Upper respiratory tract infection (URTI ) during pregnancy</b>                                                                                                               |                    |                                       |                                   |                                 |                 |
|                                                                                                                                                                                 | No                 | 974 (67.2)                            | 476 (32.8)                        | 1450                            | 0.6799          |
|                                                                                                                                                                                 | Yes                | 40 (64.5)                             | 22 (35.5)                         | 62                              |                 |
| <b>Lower respiratory tract infection (LRTI) during pregnancy</b>                                                                                                                |                    |                                       |                                   |                                 |                 |
|                                                                                                                                                                                 | No                 | 999 (67.5)                            | 480 (32.5)                        | 1479                            | 0.0134          |
|                                                                                                                                                                                 | Yes                | 15 (45.5)                             | 18 (54.5)                         | 33                              |                 |
| <b>Syphilis during pregnancy</b>                                                                                                                                                |                    |                                       |                                   |                                 |                 |
|                                                                                                                                                                                 | No                 | 979 (66.8)                            | 487 (33.2)                        | 1466                            | 0.2057          |
|                                                                                                                                                                                 | Yes                | 35 (76.1)                             | 11 (23.9)                         | 46                              |                 |
| <b>Hypertension during pregnancy</b>                                                                                                                                            |                    |                                       |                                   |                                 |                 |
|                                                                                                                                                                                 | No                 | 986 (68.0)                            | 463 (32.0)                        | 1449                            | 0.0002          |
|                                                                                                                                                                                 | Yes                | 28 (44.4)                             | 35 (55.6)                         | 63                              |                 |
| * P-values were calculated using the Fisher's exact or Fisher-Freeman-Halton exact test for categorical variables and The nonparametric Wilcoxon test for continuous variables. |                    |                                       |                                   |                                 |                 |
